# Supplementary material for: The Association Between Meningioma and Breast Cancer: A Systematic Review and Meta-analysis
Source: PubMed Central journal article supplement (PMC10276307; doi:10.1001/jamanetworkopen.2023.18620), 2023-06-16
Supplement: jamanetwopen-e2318620-s001.pdf [file jamanetwopen-e2318620-s001.pdf]

## **Data Sharing Statement**

Degeneffe. The Association Between Meningioma and Breast Cancer. *JAMA Netw Open*.  
Published June 16, 2023. doi:10.1001/jamanetworkopen.2023.18620

### **Data**

**Data available:** No
